# Supplementary material
Source: ML conference proceedings conference paper supplement (https://openreview.net/forum?id=S1RKWSyZ2Y)
Supplement: supplementary_material [file attachment]

| Method                 | MA5k         |              | MagicBrush   |              |              |
|------------------------|--------------|--------------|--------------|--------------|--------------|
|                        | SSIM↑        | LPIPS↓       | DINO↑        | CVS↑         | CTS↑         |
| InsPix2Pix             | 58.92        | 0.359        | 71.46        | 85.22        | 29.34        |
| + Enc <sub>LLaMA</sub> | 59.08        | <b>0.334</b> | 72.38        | 85.99        | 29.29        |
| + Enc <sub>LLaVA</sub> | <b>60.94</b> | <u>0.352</u> | <b>74.10</b> | <b>87.21</b> | <b>29.37</b> |
| HIVE                   | <u>65.17</u> | <u>0.302</u> | 78.95        | 88.23        | 29.42        |
| InsEdit                | 59.59        | 0.364        | <b>83.26</b> | <b>91.16</b> | <u>29.80</u> |
| MGIE                   | <b>66.25</b> | <b>0.298</b> | <u>82.22</u> | <u>91.14</u> | <b>30.40</b> |

Table 5: **Zero-shot editing comparison** to different instruction encoders (Enc), human feedback (HIVE), and mask-then-inpaint (InsEdit).

| Method     | Size | MA5k         |              | MagicBrush   |              |              |
|------------|------|--------------|--------------|--------------|--------------|--------------|
|            |      | SSIM↑        | LPIPS↓       | DINO↑        | CVS↑         | CTS↑         |
| InsPix2Pix |      | 58.92        | 0.359        | 71.46        | 85.22        | 29.34        |
| LGIE       | 7B   | <b>64.60</b> | 0.327        | <b>80.90</b> | <b>88.87</b> | 30.10        |
|            | 13B  | 63.50        | <b>0.308</b> | 80.18        | 88.77        | <b>30.31</b> |
| MGIE       | 6.7B | 63.78        | 0.300        | 78.82        | 90.01        | 29.47        |
|            | 7B   | <b>66.25</b> | <u>0.298</u> | <b>82.22</b> | <u>91.14</u> | <u>30.40</u> |
|            | 13B  | <u>65.91</u> | <b>0.279</b> | <u>82.15</u> | <b>91.52</b> | <b>30.75</b> |

Table 6: **Zero-shot editing comparison** of different LM sizes. We treat the visual-tuned OPT-6.7B in our used MGIE-6.7B.

### A ADDITIONAL RESULTS

**Comparison to More Baselines.** InsPix2Pix (Brooks et al., 2023) applies the CLIP encoder (Radford et al., 2021), which is insufficient to capture the transformation for editing. We treat the stronger LLM/MLLM as the instruction encoder (Enc) and follow the same training strategy. Table 5 presents that adopting LLaMA (Touvron et al., 2023) / LLaVA (Liu et al., 2023) can slightly outperform CLIP, and the visual-aware encoding is also crucial in the original InsPix2Pix. However, they still contain a performance gap with our MGIE, which indicates that merely replacing the instruction encoder is not enough for their limitation. We further consider HIVE (Zhang et al., 2023c) and InsEdit (Wang et al., 2023a) for the additional baselines. HIVE collects human preference and enhances InsPix2Pix via reward feedback learning. InsEdit depends on an external segmentation model to provide the target mask and performs inpainting as the editing result. The results demonstrate that MGIE consistently surpasses HIVE without extra human feedback, which is more data-efficient for training. InsEdit is superior in local editing with its mask-then-inpaint but not in global optimization. The mask should always be the entire photo, and the inpainting is not capable of adjusting the brightness or saturation. In contrast, through learning with the derivation of the MLLM, our MGIE performs robustly in both.

increase the brightness

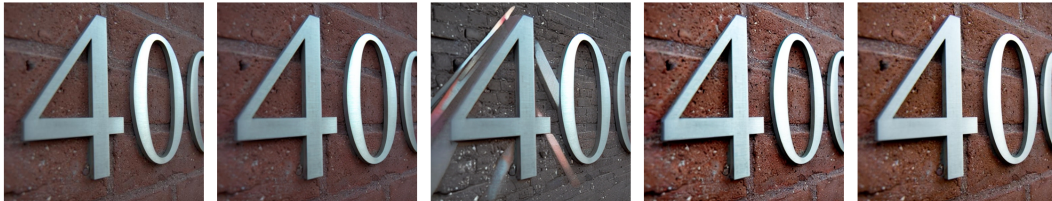

it should be a pizza on the tray

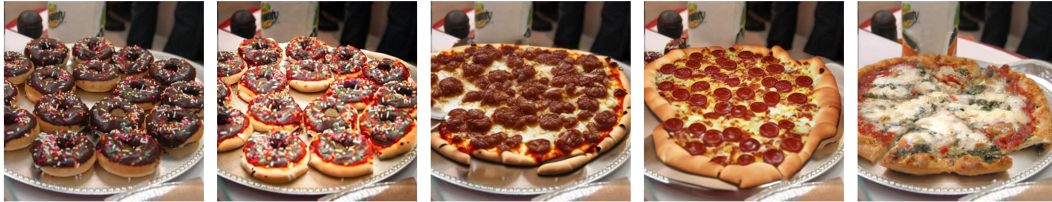

Input Image      HIVE      InsEdit      MGIE      Ground Truth

**Does Larger LM Help?** Our MGIE leverages LLMs/MLLMs to enhance instruction-based image editing. We investigate that if stronger LMs can bring more improvement. We consider the visual-tuned OPT-6.7B (Zhang et al., 2022) and the larger LLaVA-13B in Table 6. We also adopt LLaMA-13B for LGIE. Even though MGIE-7B has a similar size to MGIE-6.7B, its LLaVA is more powerful than OPT, which leads to an accurate visual imagination for better editing. The 13B obtains further performance gain for both LGIE and MGIE. Fig. 9 plots the CLIP-Score of expressive instructions by different sizes of MGIE. This indicates that the guidance from larger LMs is more alignment with the vision, and thus can benefit image editing more.

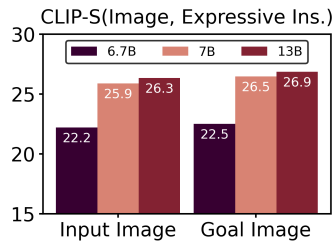

Figure 9: **CLIP-S** across images and expressive instructions by different sizes of MGIE.

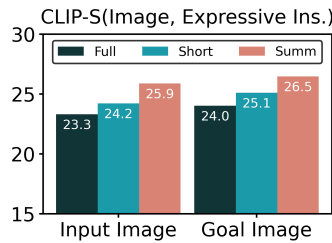

Figure 10: **CLIP-S** across images and expressive instructions (full / short / summarized).

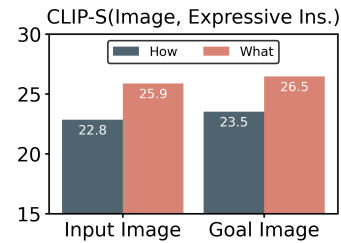

Figure 11: **CLIP-S** across images and expressive instructions by the “how” or “what” prompt.

**Learning with Summarized Expressive Instruction.** By default, MGIE learns with summarized expressive instructions for better performance and inference efficiency. We compare our form to the full description and the one making “*what will this image be like if [INS] (in short)*” as the prompt. Fig. 10 illustrates that Full is not that aligned with images due to its irrelevant narrations (e.g., “*filled with people enjoying the waterfront*”). Although Short can derive brief statements (21.1 tokens), our Summ (22.7 tokens) is still more aligned with input or goal images. In the qualitative aspect, Short’s “*create a dangerous element*” is not explicit for “*add a shark*”. Short even merely captions the photo but without “*in Seattle*”. In contrast, our Summ provides concise yet concrete guidance, such as “*a shark swimming on the lake*” or “*iconic Space Needle, urban setting*”.

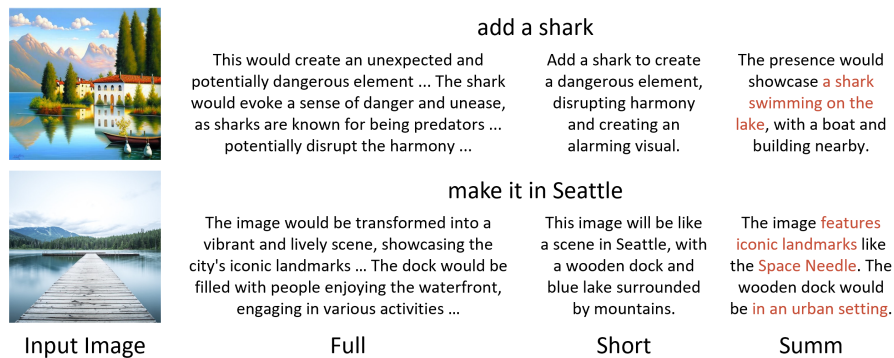

Apart from the used “*What*” prompt, we also investigate a “*How*” prompt as “*how to edit this image and [ins]*” for expressive instructions. Fig. 11 shows that our “*What*” is more aligned, which can guide image editing with more relevant visual implications, such as “*painted in hues of red, orange, and yellow*” for Autumn or “*famous landmarks as Kremlin*” for Russia. “*How*” miscomprehends the instruction as “*replace the whole garden with a beach*”. However, it should only manipulate the end of the stairs yet remain “*the stairway surrounded by lush greenery*”.

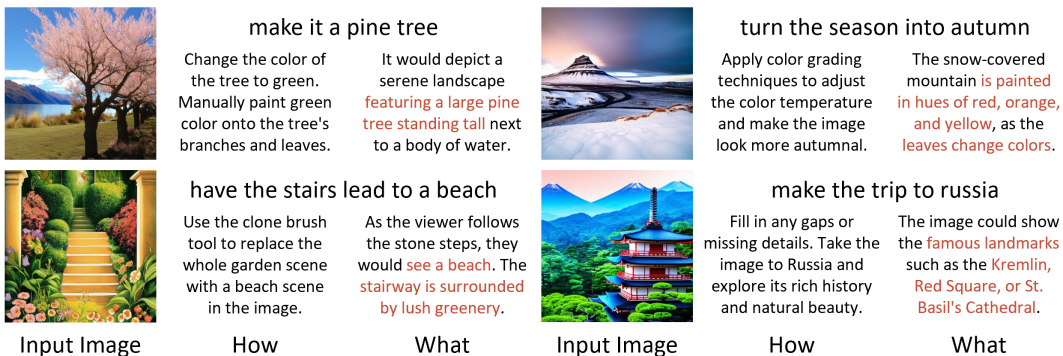

**How Many Visual Tokens do We Need?** Our editing head projects the guidance modality from the MLLM to the diffusion model. We follow GILL (Koh et al., 2023) and apply  $N=8$  visual tokens by default. Here we investigate the effectiveness of different numbers of [IMG]. The results indicate that less [IMG] makes the extracted visual imagination insufficient for effective guidance, resulting

in a significant performance drop. While more [IMG] can bring further enhancements, we also find that the performance gets similar when using more than 4 [IMG].

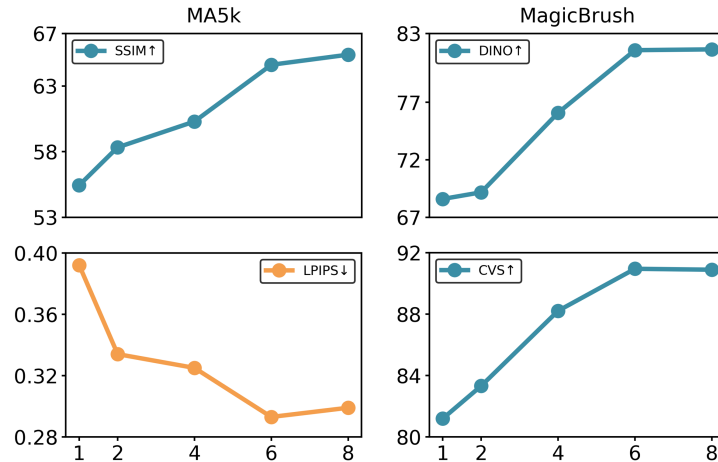

**Qualitative Results of Different  $\alpha_\gamma$ .** MGIE adopts the weight  $\alpha_\gamma$  to adjust the level of editing. A higher  $\alpha_\gamma$  makes the editing result more similar to the input, while a lower  $\alpha_\gamma$  leads to more editing applied onto the image. Hence we can control the extent of visual transformation for both local (*e.g.*, the color of cherries) and global editing (*e.g.*, the style of the painting).

make the cherry ripe purple

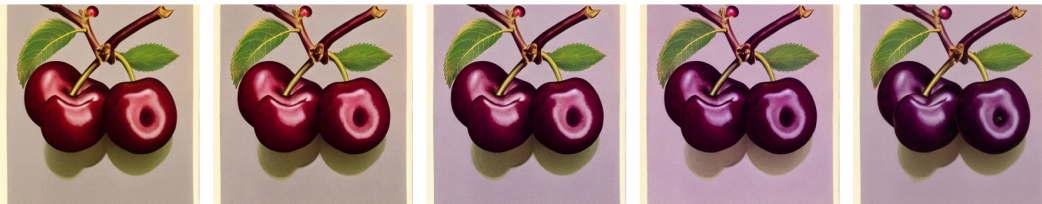

the forest path to a beach

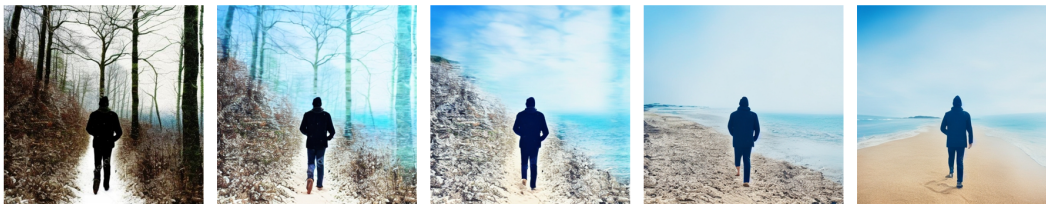

much more abstract

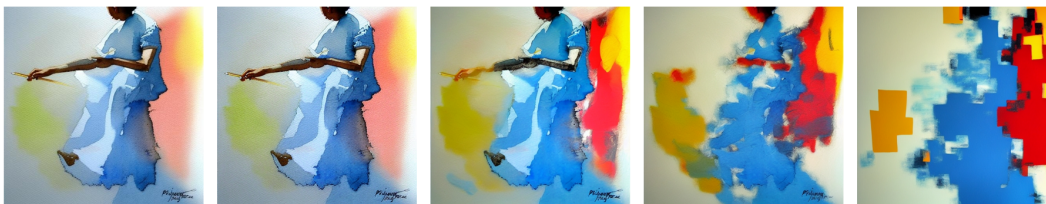

Input Image

$\alpha_\gamma = 2.2$

1.8

1.4

1.0

**Comparison to Description-based Baselines.** In addition to instruction-based baselines, we also consider description-based editing models. We leverage GIT (Wang et al., 2022) to caption the input image as its input description and ChatGPT to merge the edit instruction as the goal description via the prompt “Combine two sentences A: [description] and B: [instruction] into a single sentence. The output should be at most similar to sentence A”. For instance, “a girl is walking at the beach” and “give her a hat” will be transformed into “a girl with a hat is walking at the beach”. For

MagicBrush, we directly apply their released descriptions instead. Text2LIVE (Bar-Tal et al., 2022) and Null-Inv (Mokady et al., 2022) only yield feasible results on the traditional L1 distance but are obviously inferior to our MGIE on semantic-level evaluations (*e.g.*, lower CVS), which supports that they cannot present concrete editing results and carry out goal descriptions well. On the other hand, both count on inference optimization (CLIP alignment and DDIM inversion), which takes more than 200 seconds (*vs.* ours 9.2 seconds) for each editing task.

| Method     | EVR          |              |              | GIER         |              |              | MA5k         |              |              | MagicBrush   |              |              |              |
|------------|--------------|--------------|--------------|--------------|--------------|--------------|--------------|--------------|--------------|--------------|--------------|--------------|--------------|
|            | L1↓          | DINO↑        | CVS↑         | L1↓          | SSIM↑        | CVS↑         | L1↓          | SSIM↑        | LPIPS↓       | L1↓          | DINO↑        | CVS↑         | CTS↑         |
| Text2LIVE  | 0.169        | 66.19        | 78.22        | <b>0.126</b> | <u>58.32</u> | 79.32        | 0.165        | 57.62        | 0.342        | <b>0.071</b> | <b>83.35</b> | <u>89.71</u> | 23.59        |
| Null-Inv   | 0.174        | <u>69.24</u> | 78.35        | 0.149        | 58.24        | 82.33        | 0.179        | <u>61.36</u> | <u>0.335</u> | <u>0.073</u> | 81.72        | 87.24        | 27.62        |
| InsPix2Pix | 0.189        | <u>67.82</u> | <u>81.38</u> | 0.144        | 57.51        | <u>86.63</u> | 0.176        | 58.92        | 0.359        | 0.101        | 71.46        | 85.22        | <u>29.34</u> |
| MGIE       | <b>0.163</b> | <b>71.49</b> | <b>81.73</b> | <u>0.135</u> | <b>59.24</b> | <b>88.59</b> | <b>0.133</b> | <b>66.25</b> | <b>0.298</b> | 0.082        | <u>82.22</u> | <b>91.14</b> | <b>30.40</b> |

**Evaluating Image Editing via FID.** As ground-truth goal images are available, we also calculate the Fréchet inception distance (FID) for editing results under the zero-shot or fine-tuned evaluation. However, the differences are all pretty limited. Since most editing results still resemble the original input images, it is difficult for FID to determine their authenticity. These results indicate that FID is insufficient to compare the quality of image editing.

| Method     | Zero-shot   |             |             |             | Fine-tuned  |             |             |             |
|------------|-------------|-------------|-------------|-------------|-------------|-------------|-------------|-------------|
|            | EVR         | GIER        | MA5k        | MagicBrush  | EVR         | GIER        | MA5k        | MagicBrush  |
| InsPix2Pix | <b>6.19</b> | <b>5.61</b> | 5.91        | 5.69        | <b>5.31</b> | <b>5.31</b> | <b>5.30</b> | 5.64        |
| LGIE       | 6.67        | 5.69        | <u>5.80</u> | <b>5.31</b> | <u>5.32</u> | <u>5.42</u> | 5.59        | <u>5.48</u> |
| MGIE       | <u>6.45</u> | <u>5.64</u> | <b>5.48</b> | <u>5.61</u> | 5.53        | 5.59        | <u>5.41</u> | <b>5.42</b> |

**Part-of-Speech Distribution.** We investigate part-of-speech (POS) distributions<sup>5</sup> of input instructions and our derived expressive instructions. In general, input instructions involve more nouns but fewer adjectives. In contrast, our expressive instructions can portray concrete edited scenes in detail via more adjectives. The original instructions are also dominated by verbs, which are challenging to perceive. The derivation helps them to be more understandable as adverbs. Moreover, we effectively decrease the number of ambiguous pronouns. More than 68% pronouns (only 13% in our expressive instructions) are unresolvable in input instructions<sup>6</sup>, where the model can not have explicit goals.

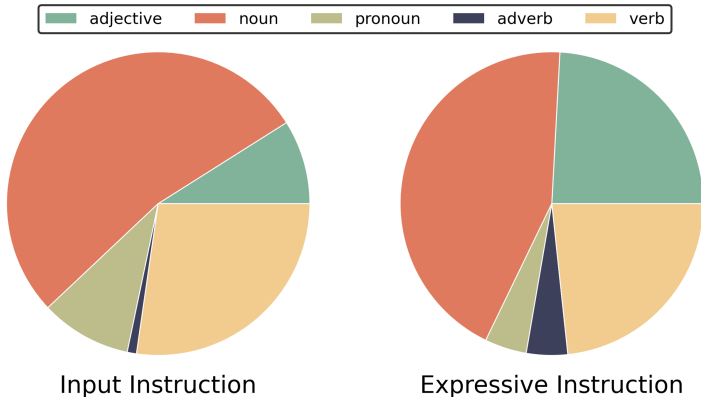

**Unseen Editing Operation.** Since there is no removal or photo optimization in IPr2Pr, InsPix2Pix has failed due to the shortage of training examples. Our MGIE is able to handle such editing via the visual-aware derivation of MLLM. We can accurately remove “*the boy in red shirt*” or “*lighten out the yellow tone*”, which demonstrates better generalizability for unseen operations. More qualitative comparisons can be found on our project website<sup>4</sup>.

<sup>5</sup>We adopt flairNLP (<https://github.com/flairNLP/flair>) as the part-of-speech tagger.

<sup>6</sup>We apply AllenNLP (<https://github.com/allenai/allennlp>) for coreference resolution.

remove text

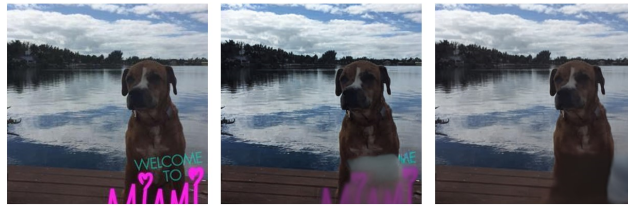

remove boy with red shirt from picture

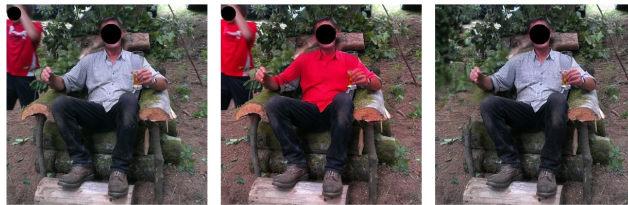

remove hot air balloon

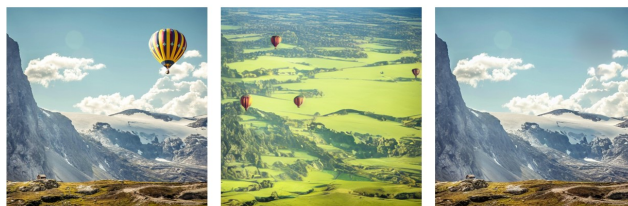

need to clarified, more focus

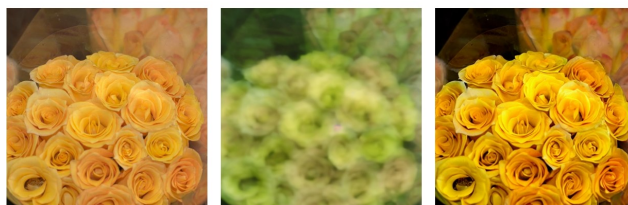

please reduce the brightness of the image

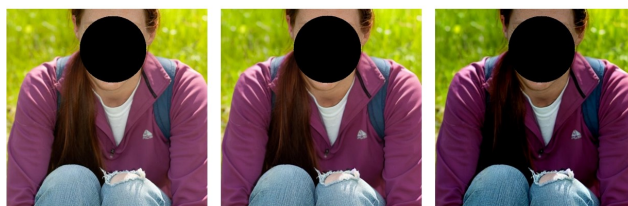

lighten out yellow tone

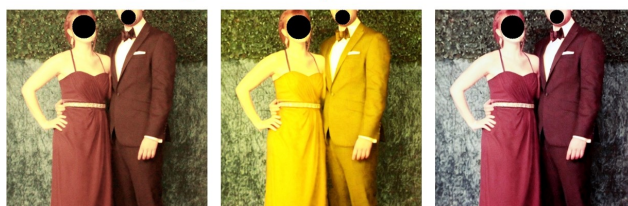

Input Image

InsPix2Pix

MGIE

**Ablation Study of Training Loss.** There are two training losses, instruction loss ( $\mathcal{L}_{ins}$ ) and editing loss ( $\mathcal{L}_{edit}$ ), in our MGIE.  $\mathcal{L}_{edit}$  is necessary for training to produce the editing result. Without  $\mathcal{L}_{ins}$ , it will derive full but lengthy guidance to lead  $\mathcal{L}_{edit}$ . However, both LGIE and MGIE drop significantly; LGIE even performs worse than the baseline. This underscores the prominence of learning concise expressive instructions, which offer succinct and relevant guidance. Besides, lengthy instructions via the MLLM will incur additional overhead (29.4 vs. ours 9.2), resulting in an inefficient inference.

| Method Setting | MA5k                  |                    | MagicBrush      |                |                |              |
|----------------|-----------------------|--------------------|-----------------|----------------|----------------|--------------|
|                | SSIM $\uparrow$       | LPIPS $\downarrow$ | DINO $\uparrow$ | CVS $\uparrow$ | CTS $\uparrow$ |              |
| InsPix2Pix     | 58.92                 | 0.359              | 71.46           | 85.22          | 29.34          |              |
| LGIE           | - $\mathcal{L}_{ins}$ | 57.59              | 0.386           | 70.79          | 83.21          | 28.66        |
|                | + $\mathcal{L}_{ins}$ | <b>64.60</b>       | <b>0.327</b>    | <b>80.90</b>   | <b>88.87</b>   | <b>30.10</b> |
| MGIE           | - $\mathcal{L}_{ins}$ | 58.18              | 0.365           | 71.50          | 85.19          | 29.11        |
|                | + $\mathcal{L}_{ins}$ | <b>66.25</b>       | <b>0.298</b>    | <b>82.22</b>   | <b>91.14</b>   | <b>30.40</b> |

**Adding New Object.** MGIE also supports adding new objects that are not present in the input and placing them in reasonable positions. For instance, the “*hat*” is put on the girl’s head, and the “*river*” is added along with the grass. More surprisingly, the appended “*fireworks*” further makes the beach colorful, which drives the night scene coherent and visually appealing.

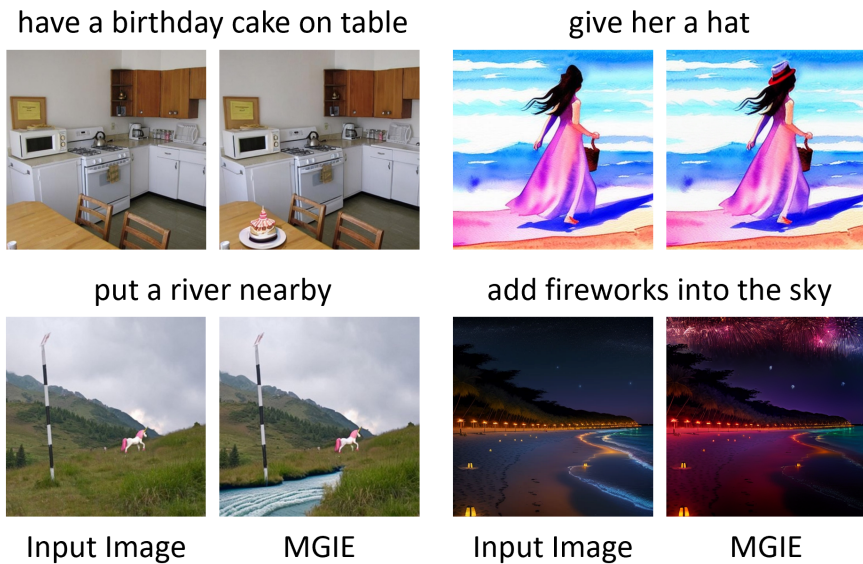

**Transferring Image Texture/Color/Emotion.** We attempt transferring visual patterns of images, also controlled through human instructions. For texture, we follow CLVA (Fu et al., 2022) and adopt the style prompt “*make the whole image as texture [ins]*”. InsPix2Pix can only do limited transfer, but MGIE shows clear visual attributes (e.g., “*orange*” or “*pinkish*”) as well as the complex “*colorful circular round*”. We perform fine-grained color manipulation, including “*glasses frame*” or “*hair*”. However, the baseline even alters the whole color. For global colorization (Chang et al., 2023), both InsPix2Pix and our MGIE cannot present appealing results, which indicates the need for fine-tuning. Transferring the emotion is more challenging as the model has to perceive the latent semantics. We are able to illustrate the visual concept of “*bright day*” or “*chaotic and confused*” as the beach in the early morning or the gloomy street at night. MGIE can also transform from the cozy snowy day into suspenseful and thrilling through “*nightmare and scared*”. Although exhibiting promising potential, it still requests more profound texture/emotion perception for each specific goal. We leave them as future research for creative visual editing (Weng et al., 2023).

hexagonal, orange, blue, smooth white

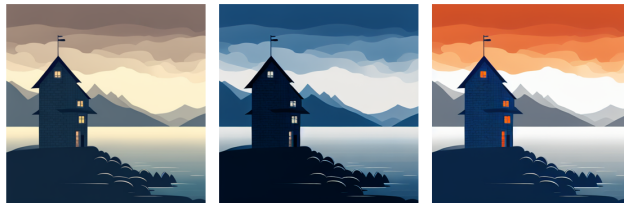

pinkish, interlaced, cloth, like pillow cover

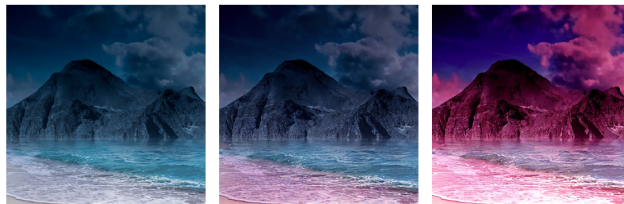

colorful smooth pretty circular round

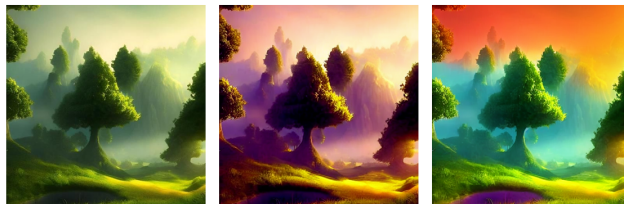

Input Image

InsPix2Pix

MGIE

*color/emotion results on the next page*

make the frame red

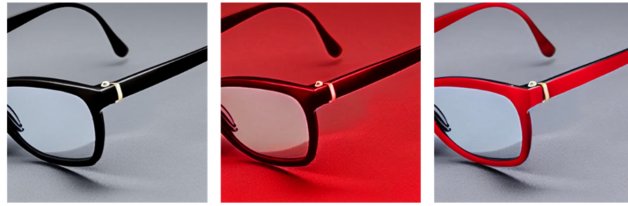

change the hair to green color

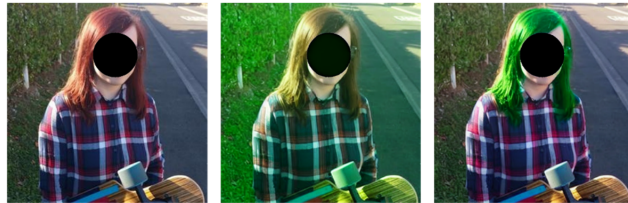

as a colorful image

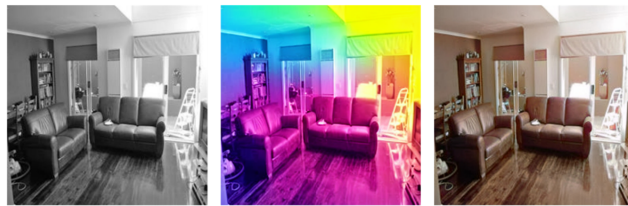

feel chaotic and confused due to the tone

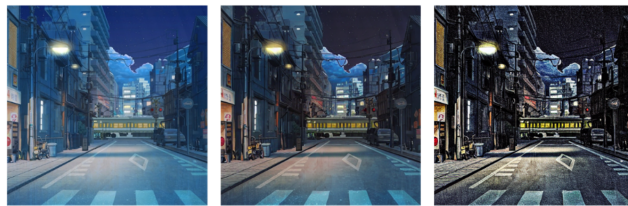

charmed by the beautiful bright day

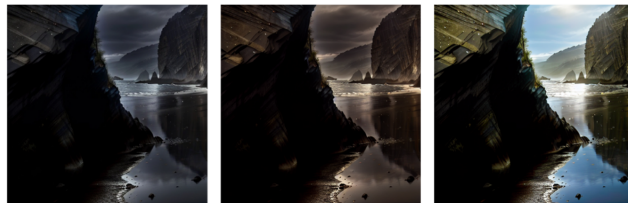

out of nightmare, utterly scared and shaken

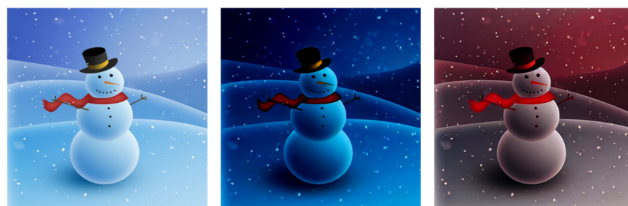

Input Image

InsPix2Pix

MGIE



## B DETAILED EXPERIMENTAL SETUP

**Edit Head to Joint the MLLM and the Diffusion Model.** These appended visual tokens [IMG] are treated as the latent imagination of the editing goal from the MLLM but in the language modality. Inspired by GILL (Koh et al., 2023), we consider an edit head  $\mathcal{T}$  to transform them into actual visual guidance.  $\mathcal{T}$  is a lightweight 4-layer Transformer, which takes word embeddings  $e$  and hidden states  $h$  of [IMG] as the input and generates the visual imagination  $\{u_1, \dots, u_L\}$ , conditioned on learnable query embeddings  $\{q_1, \dots, q_L\}$ . As our diffusion model is inherited from StableDiffusion (Rombach et al., 2022), we apply the same  $L = 77$ , and the dimension of  $u$  is 768.

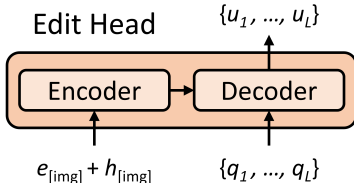

**Editing Loss of the Diffusion Model.** Our diffusion model is built upon latent diffusion  $\mathcal{F}$  (Rombach et al., 2022), which operates the latent space of the variational autoencoder (VAE). For the goal image  $\mathcal{O}$ , the diffusion process keeps adding noises to the encoded  $o = \text{Enc}_{\text{VAE}}(\mathcal{O})$  and produces a noisy latent  $z_t$ . Our target is to learn the UNet  $\epsilon_\theta$  that predicts the added noise according to the input image  $v = \text{Enc}_{\text{VAE}}(\mathcal{V})$  and the visual imagination  $\{u\}$  from the MLLM. The learning objective is:

$$\mathcal{L}_{\text{edit}} = \mathbb{E}_{o,v,\{u\},\epsilon \sim \mathcal{N}(0,1),t} [\|\epsilon - \epsilon_\theta(z_t, t, v, \{u\})\|_2^2].$$

Following InsPix2Pix (Brooks et al., 2023), we leverage the classifier-free guidance (Ho & Salimans, 2021), which combines both conditional and unconditional (a fixed null value  $\emptyset$ ) denoising. During inference, we let the score estimation  $s_\theta$  extrapolate toward the conditional yet keep away from the unconditional guidance. Since there are two conditionings ( $v$  for image and  $\{u\}$  for instruction), our modified  $s_\theta$  should be:

$$\begin{aligned} s_\theta(z_t, v, \{u\}) &= s_\theta(z_t, \emptyset, \emptyset) \\ &+ \alpha_\gamma \cdot (s_\theta(z_t, v, \emptyset) - s_\theta(z_t, \emptyset, \emptyset)) \\ &+ \alpha_\chi \cdot (s_\theta(z_t, v, \{u\}) - s_\theta(z_t, v, \emptyset)), \end{aligned}$$

where we randomly set  $v = \emptyset$ ,  $\{u\} = \emptyset$ , or both  $= \emptyset$  for 5% of data during training.  $\alpha_\gamma$  and  $\alpha_\chi$  are guidance scales to control the trade-off between input image similarity and instruction alignment. By default, we use  $\alpha_\gamma = 1.5$  and  $\alpha_\chi = 7.5$ .

**Training Cost.** Our MGIE training requires 26 epochs to converge, and InsPix2Pix has 20 epochs (from their released checkpoint). Both MGIE and InsPix2Pix take a similar 1.6 hours per epoch on our node (8 NVIDIA A100 GPUs), where the overall training can be done in two days.

**Human Evaluation.** We sample 100 examples (25 for each dataset) to conduct our human evaluation. Each task is assigned 3 annotators, who rank across baselines and our MGIE, to avoid potential bias. We require workers to have a 97% approval rate and over 500 approved tasks to ensure quality. The worker is awarded \$5 for each task (5 examples) and takes 21 minutes on average to complete.

## C ETHICS DISCUSSION AND LIMITATION

In this paper, we leverage multimodal large language models (MLLMs) with the diffusion model to enhance instruction-based image editing. Even though our work benefits creative visual applications, there are still limitations that should be taken into consideration when interpreting the results. Since our MGIE is built upon pre-trained foundation models, it is possible to inherit bias from LLaVA and StableDiffusion. To mitigate this issue, we make the derived expressive instruction concise through summarization and update the MLLM together with the diffusion model. This end-to-end learning can also reduce the potential harmfulness since the hallucination from the LM will not be expressed over the editing. We can incorporate the safety checker (Rombach et al., 2022) to filter out offensive results during post-processing as the final line of defense. From the perspective of editing, there are

some challenging cases. Compositional command is hard to accomplish in a single step. Our MGIE can successfully remove the left sign but not the subsequent manipulation. In addition, the ability of language grounding (*e.g.*, only the potato should be replaced), as well as numerical perception (*e.g.*, just add to one cupcake), can be improved for more accurate targeting. We leave these directions as future research to achieve more practical and powerful instruction-based image editing.

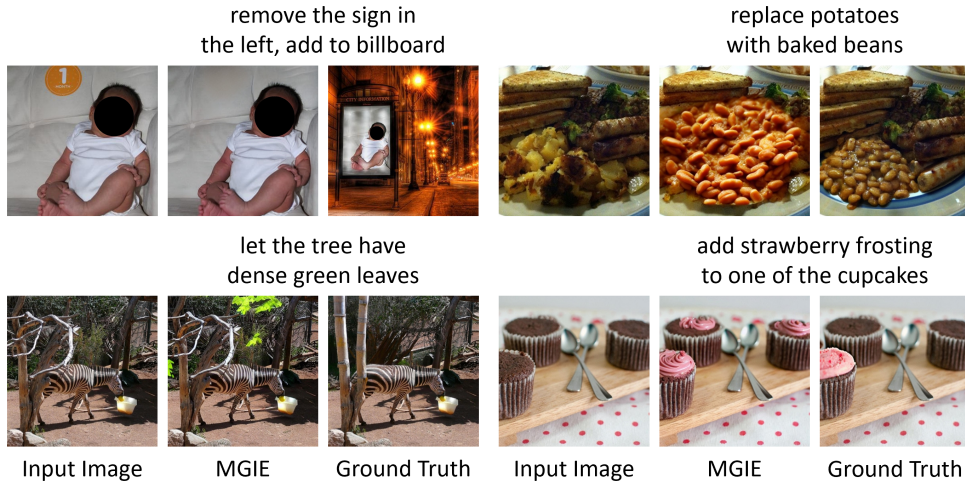

## REFERENCES

- Omri Avrahami, Dani Lischinski, and Ohad Fried. Blended Diffusion for Text-driven Editing of Natural Images. In *Conference on Computer Vision and Pattern Recognition (CVPR)*, 2022.
- Omer Bar-Tal, Dolev Ofri-Amar, Rafail Fridman, Yoni Kasten, and Tali Dekel. Text2LIVE: Text-Driven Layered Image and Video Editing. In *European Conference on Computer Vision (ECCV)*, 2022.
- Tim Brooks, Aleksander Holynski, and Alexei A. Efros. InstructPix2Pix: Learning to Follow Image Editing Instructions. In *Conference on Computer Vision and Pattern Recognition (CVPR)*, 2023.
- Tom B. Brown, Benjamin Mann, Nick Ryder, Melanie Subbiah, Jared Kaplan, Prafulla Dhariwal, Arvind Neelakantan, Pranav Shyam, Girish Sastry, Amanda Askell, Sandhini Agarwal, Ariel Herbert-Voss, Gretchen Krueger, Tom Henighan, Rewon Child, Aditya Ramesh, Daniel M. Ziegler, Jeffrey Wu, Clemens Winter, Christopher Hesse, Mark Chen, Eric Sigler, Mateusz Litwin, Scott Gray, Benjamin Chess, Jack Clark, Christopher Berner, Sam McCandlish, Alec Radford, Ilya Sutskever, and Dario Amodei. Language Models are Few-Shot Learners. In *Conference on Neural Information Processing Systems (NeurIPS)*, 2020.
- Mathilde Caron, Hugo Touvron, Ishan Misra, Hervé Jégou, Julien Mairal, Piotr Bojanowski, and Armand Joulin. Emerging Properties in Self-Supervised Vision Transformers. In *International Conference on Computer Vision (ICCV)*, 2021.
- Tuhin Chakrabarty, Arkadiy Saakyan, Olivia Winn, Artemis Panagopoulou, Yue Yang, Marianna Apidianaki, and Smaranda Muresan. I Spy a Metaphor: Large Language Models and Diffusion Models Co-Create Visual Metaphors. In *Annual Meetings of the Association for Computational Linguistics (ACL)*, 2023.
- Zheng Chang, Shuchen Weng, Peixuan Zhang, Yu Li, Si Li, and Boxin Shi. L-CAD: Language-based Colorization with Any-level Descriptions using Diffusion Priors. In *Conference on Neural Information Processing Systems (NeurIPS)*, 2023.
- Aakanksha Chowdhery, Sharan Narang, Jacob Devlin, Maarten Bosma, Gaurav Mishra, Adam Roberts, Paul Barham, Hyung Won Chung, Charles Sutton, Sebastian Gehrmann, Parker Schuh, Kensen Shi, Sasha Tsvyashchenko, Joshua Maynez, Abhishek Rao, Parker Barnes, Yi Tay, Noam Shazeer, Vinodkumar Prabhakaran, Emily Reif, Nan Du, Ben Hutchinson, Reiner Pope, James Bradbury, Jacob Austin, Michael Isard, Guy Gur-Ari, Pengcheng Yin, Toju Duke, Anselm Levskaya, Sanjay Ghemawat, Sunipa Dev, Henryk Michalewski, Xavier Garcia, Vedant Misra, Kevin Robinson, Liam Fedus, Denny Zhou, Daphne Ippolito, David Luan, Hyeontaek Lim, Barret Zoph, Alexander Spiridonov, Ryan Sepassi, David Dohan, Shivani Agrawal, Mark Omernick, Andrew M. Dai, Thanumalayan Sankaranarayanan Pillai, Marie Pellat, Aitor Lewkowycz, Erica Moreira, Rewon Child, Oleksandr Polozov, Katherine Lee, Zongwei Zhou, Xuezhi Wang, Brennan Saeta, Mark Diaz, Orhan Firat, Michele Catasta, Jason Wei, Kathy Meier-Hellstern, Douglas Eck, Jeff Dean, Slav Petrov, and Noah Fiedel. PaLM: Scaling Language Modeling with Pathways. In *arXiv:2204.02311*, 2022.
- Hyung Won Chung, Le Hou, Shayne Longpre, Barret Zoph, Yi Tay, William Fedus, Yunxuan Li, Xuezhi Wang, Mostafa Dehghani, Siddhartha Brahma, Albert Webson, Shixiang Shane Gu, Zhuyun Dai, Mirac Suzgun, Xinyun Chen, Aakanksha Chowdhery, Alex Castro-Ros, Marie Pellat, Kevin Robinson, Dasha Valter, Sharan Narang, Gaurav Mishra, Adams Yu, Vincent Zhao, Yanping Huang, Andrew Dai, Hongkun Yu, Slav Petrov, Ed H. Chi, Jeff Dean, Jacob Devlin, Adam Roberts, Denny Zhou, Quoc V. Le, and Jason Wei. Scaling Instruction-Finetuned Language Models. In *arXiv:2210.11416*, 2022.
- Guillaume Couairon, Jakob Verbeek, Holger Schwenk, and Matthieu Cord. DiffEdit: Diffusion-based Semantic Image Editing with Mask Guidance. In *International Conference on Learning Representations (ICLR)*, 2023.
- Katherine Crowson, Stella Biderman, Daniel Kornis, Dashiell Stander, Eric Hallahan, Louis Casciato, and Edward Raff. VQGAN-CLIP: Open Domain Image Generation and Editing with Natural Language Guidance. In *European Conference on Computer Vision (ECCV)*, 2022.

- Alaeldin El-Nouby, Shikhar Sharma, Hannes Schulz, Devon Hjelm, Layla El Asri, Samira Ebrahimi Kahou, Yoshua Bengio, and Graham W. Taylor. Tell, Draw, and Repeat: Generating and Modifying Images Based on Continual Linguistic Instruction. In *International Conference on Computer Vision (ICCV)*, 2019.
- Weixi Feng, Wanrong Zhu, Tsu-Jui Fu, Varun Jampani, Arjun Akula, Xuehai He, Sugato Basu, Xin Eric Wang, and William Yang Wang. LayoutGPT: Compositional Visual Planning and Generation with Large Language Models. In *arXiv:2305.15393*, 2023.
- Tsu-Jui Fu, Xin Eric Wang, Scott Grafton, Miguel Eckstein, and William Yang Wang. SSCR: Iterative Language-Based Image Editing via Self-Supervised Counterfactual Reasoning. In *Conference on Empirical Methods in Natural Language Processing (EMNLP)*, 2020.
- Tsu-Jui Fu, Xin Eric Wang, and William Yang Wang. Language-Driven Artistic Style Transfer. In *European Conference on Computer Vision (ECCV)*, 2022.
- Rinon Gal, Or Patashnik, Haggai Maron, Gal Chechik, and Daniel Cohen-Or. StyleGAN-NADA: CLIP-Guided Domain Adaptation of Image Generators. In *Special Interest Group on Computer Graphics and Interactive Techniques (SIGGRAPH)*, 2022.
- Ian J. Goodfellow, Jean Pouget-Abadie, Mehdi Mirza, Bing Xu, David Warde-Farley, Sherjil Ozair, Aaron Courville, and Yoshua Bengio. Generative Adversarial Networks. In *Conference on Neural Information Processing Systems (NeurIPS)*, 2015.
- Jing Gu, Yilin Wang, Nanxuan Zhao, Tsu-Jui Fu, Wei Xiong, Qing Liu, Zhifei Zhang, He Zhang, Jianming Zhang, Hyunjoon Jung, and Xin Eric Wang. Photoswap: Personalized Subject Swapping in Images. In *arXiv:2305.18286*, 2023.
- Tanmay Gupta and Aniruddha Kembhavi. Visual Programming: Compositional visual reasoning without training. In *Conference on Computer Vision and Pattern Recognition (CVPR)*, 2023.
- Amir Hertz, Ron Mokady, Jay Tenenbaum, Kfir Aberman, Yael Pritch, and Daniel Cohen-Or. Prompt-to-Prompt Image Editing with Cross Attention Control. In *International Conference for Learning Representations (ICLR)*, 2023.
- Jack Hessel, Ari Holtzman, Maxwell Forbes, Ronan Le Bras, and Yejin Choi. CLIPScore: A Reference-free Evaluation Metric for Image Captioning. In *Conference on Empirical Methods in Natural Language Processing (EMNLP)*, 2021.
- Jonathan Ho and Tim Salimans. Classifier-Free Diffusion Guidance. In *Conference on Neural Information Processing Systems (NeurIPS)*, 2021.
- Jonathan Ho, Ajay Jain, and Pieter Abbeel. Denoising Diffusion Probabilistic Models. In *Conference on Neural Information Processing Systems (NeurIPS)*, 2020.
- Wenlong Huang, Pieter Abbeel, Deepak Pathak, and Igor Mordatch. Language Models as Zero-Shot Planners: Extracting Actionable Knowledge for Embodied Agents. In *International Conference on Machine Learning (ICML)*, 2022.
- Bahjat Kawar, Shiran Zada, Oran Lang, Omer Tov, Huiwen Chang, Tali Dekel, Inbar Mosseri, and Michal Irani. Imagic: Text-Based Real Image Editing with Diffusion Models. In *Conference on Computer Vision and Pattern Recognition (CVPR)*, 2023.
- Gwanghyun Kim, Taesung Kwon, and Jong Chul Ye. DiffusionCLIP: Text-Guided Diffusion Models for Robust Image Manipulation. In *Conference on Computer Vision and Pattern Recognition (CVPR)*, 2022.
- Jing Yu Koh, Daniel Fried, and Ruslan Salakhutdinov. Generating Images with Multimodal Language Models. In *arXiv:2305.17216*, 2023.
- Bowen Li, Xiaojuan Qi, Thomas Lukasiewicz, and Philip H. S. Torr. ManiGAN: Text-Guided Image Manipulation. In *Conference on Computer Vision and Pattern Recognition (CVPR)*, 2020.

- Dongxu Li, Junnan Li, and Steven Hoi. BLIP-Diffusion: Pre-trained Subject Representation for Controllable Text-to-Image Generation and Editing. In *arXiv:2305.14720*, 2023a.
- Junnan Li, Dongxu Li, Silvio Savarese, and Steven Hoi. BLIP-2: Bootstrapping Language-Image Pre-training with Frozen Image Encoders and Large Language Models. In *International Conference on Machine Learning (ICML)*, 2023b.
- Long Lian, Boyi Li, Adam Yala, and Trevor Darrell. LLM-grounded Diffusion: Enhancing Prompt Understanding of Text-to-Image Diffusion Models with Large Language Models. In *arXiv:2305.13655*, 2023.
- Haotian Liu, Chunyuan Li, Qingyang Wu, and Yong Jae Lee. Visual Instruction Tuning. In *arXiv:2304.08485*, 2023.
- Ilya Loshchilov and Frank Hutter. Decoupled Weight Decay Regularization. In *International Conference for Learning Representations (ICLR)*, 2019.
- Pan Lu, Baolin Peng, Hao Cheng, Michel Galley, Kai-Wei Chang, Ying Nian Wu, Song-Chun Zhu, and Jianfeng Gao. Chameleon: Plug-and-Play Compositional Reasoning with Large Language Models. In *arXiv:2304.09842*, 2023.
- Chenlin Meng, Yutong He, Yang Song, Jiaming Song, Jiajun Wu, Jun-Yan Zhu, and Stefano Ermon. SDEdit: Guided Image Synthesis and Editing with Stochastic Differential Equations. In *International Conference for Learning Representations (ICLR)*, 2022.
- Ron Mokady, Amir Hertz, Kfir Aberman, Yael Pritch, and Daniel Cohen-Or. Null-text Inversion for Editing Real Images using Guided Diffusion Models. In *Conference on Computer Vision and Pattern Recognition (CVPR)*, 2022.
- Seonghyeon Nam, Yunji Kim, and Seon Joo Kim. Text-Adaptive Generative Adversarial Networks: Manipulating Images with Natural Language. In *Conference on Neural Information Processing Systems (NeurIPS)*, 2018.
- Alex Nichol, Prafulla Dhariwal, Aditya Ramesh, Pranav Shyam, Pamela Mishkin, Bob McGrew, Ilya Sutskever, and Mark Chen. GLIDE: Towards Photorealistic Image Generation and Editing with Text-Guided Diffusion Models. In *International Conference on Machine Learning (ICML)*, 2022.
- Adam Paszke, Sam Gross, Soumith Chintala, Gregory Chanan, Edward Yang, Zachary DeVito, Zeming Lin, Alban Desmaison, Luca Antiga, and Adam Lerer. Automatic differentiation in PyTorch. In *International Conference on Learning Representations Workshop (ICLRW)*, 2017.
- Or Patashnik, Zongze Wu, Eli Shechtman, Daniel Cohen-Or, and Dani Lischinski. StyleCLIP: Text-Driven Manipulation of StyleGAN Imagery. In *International Conference on Computer Vision (ICCV)*, 2021.
- Alec Radford, Jong Wook Kim, Chris Hallacy, Aditya Ramesh, Gabriel Goh, Sandhini Agarwal, Girish Sastry, Amanda Askell, Pamela Mishkin, Jack Clark, Gretchen Krueger, and Ilya Sutskever. Learning Transferable Visual Models From Natural Language Supervision. In *International Conference on Machine Learning (ICML)*, 2021.
- Aditya Ramesh, Prafulla Dhariwal, Alex Nichol, Casey Chu, and Mark Chen. Hierarchical Text-Conditional Image Generation with CLIP Latents. In *arXiv:2204.06125*, 2022.
- Scott Reed, Zeynep Akata, Xinchun Yan, Lajanugen Logeswaran, Bernt Schiele, and Honglak Lee. Generative Adversarial Text to Image Synthesis. In *International Conference on Machine Learning (ICML)*, 2016.
- Robin Rombach, Andreas Blattmann, Dominik Lorenz, Patrick Esser, and Björn Ommer. High-Resolution Image Synthesis with Latent Diffusion Models. In *Conference on Computer Vision and Pattern Recognition (CVPR)*, 2022.

- Chitwan Sahari, William Chan, Saurabh Saxena, Lala Li, Jay Whang, Emily Denton, Seyed Kamyar Seyed Ghasemipour, Burcu Karagol Ayan, S. Sara Mahdavi, Rapha Gontijo Lopes, Tim Salimans, Jonathan Ho, David J Fleet, and Mohammad Norouzi. Photorealistic Text-to-Image Diffusion Models with Deep Language Understanding. In *Conference on Neural Information Processing Systems (NeurIPS)*, 2022.
- Jing Shi, Ning Xu, Trung Bui, Franck Deroncourt, Zheng Wen, and Chenliang Xu. A Benchmark and Baseline for Language-Driven Image Editing. In *Asian Conference on Computer Vision (ACCV)*, 2020.
- Jing Shi, Ning Xu, Yihang Xu, Trung Bui, Franck Deroncourt, and Chenliang Xu. Learning by Planning: Language-Guided Global Image Editing. In *Conference on Computer Vision and Pattern Recognition (CVPR)*, 2022.
- Quan Sun, Qiyang Yu, Yufeng Cui, Fan Zhang, Xiaosong Zhang, Yueze Wang, Hongcheng Gao, Jingjing Liu, Tiejun Huang, and Xinlong Wang. Generative Pretraining in Multimodality. In *arXiv:2307.05222*, 2023.
- Dídac Surís, Sachit Menon, and Carl Vondrick. ViperGPT: Visual Inference via Python Execution for Reasoning. In *arXiv:2303.08128*, 2023.
- Hao Tan, Franck Deroncourt, Zhe Lin, Trung Bui, and Mohit Bansal. Expressing Visual Relationships via Language. In *Annual Meetings of the Association for Computational Linguistics (ACL)*, 2019.
- Hugo Touvron, Thibaut Lavril, Gautier Izacard, Xavier Martinet, Marie-Anne Lachaux, Timothée Lacroix, Baptiste Rozière, Naman Goyal, Eric Hambro, Faisal Azhar, Aurelien Rodriguez, Armand Joulin, Edouard Grave, and Guillaume Lample. LLaMA: Open and Efficient Foundation Language Models. In *arXiv:2302.13971*, 2023.
- Jianfeng Wang, Zhengyuan Yang, Xiaowei Hu, Linjie Li, Kevin Lin, Zhe Gan, Zicheng Liu, Ce Liu, and Lijuan Wang. GIT: A Generative Image-to-text Transformer for Vision and Language. In *Transactions on Machine Learning Research (TMLR)*, 2022.
- Qian Wang, Biao Zhang, Michael Birsak, and Peter Wonka. InstructEdit: Improving Automatic Masks for Diffusion-based Image Editing With User Instructions. In *arXiv:2305.18047*, 2023a.
- Su Wang, Chitwan Saharia, Ceslee Montgomery, Jordi Pont-Tuset, Shai Noy, Stefano Pellegrini, Yasumasa Onoe, Sarah Laszlo, David J. Fleet, Radu Soricut, Jason Baldridge, Mohammad Norouzi, Peter Anderson, and William Chan. Imagen Editor and EditBench: Advancing and Evaluating Text-Guided Image Inpainting. In *Conference on Computer Vision and Pattern Recognition (CVPR)*, 2023b.
- Shuchen Weng, Peixuan Zhang, Zheng Chang, Xinlong Wang, Si Li, and Boxin Shi. Affective Image Filter: Reflecting Emotions from Text to Images. In *International Conference on Computer Vision (ICCV)*, 2023.
- Chenfei Wu, Shengming Yin, Weizhen Qi, Xiaodong Wang, Zecheng Tang, and Nan Duan. Visual ChatGPT: Talking, Drawing and Editing with Visual Foundation Models. In *arXiv:2303.04671*, 2023.
- Zhengyuan Yang, Linjie Li, Jianfeng Wang, Kevin Lin, Ehsan Azarnasab, Faisal Ahmed, Zicheng Liu, Ce Liu, Michael Zeng, and Lijuan Wang. MM-REACT: Prompting ChatGPT for Multimodal Reasoning and Action. In *arXiv:2303.11381*, 2023.
- Kai Zhang, Lingbo Mo, Wenhui Chen, Huan Sun, and Yu Su. MagicBrush: A Manually Annotated Dataset for Instruction-Guided Image Editing. In *arXiv:2306.10012*, 2023a.
- Renrui Zhang, Jiaming Han, Chris Liu, Peng Gao, Aojun Zhou, Xiangfei Hu, Shilin Yan, Pan Lu, Hongsheng Li, and Yu Qiao. LLaMA-Adapter: Efficient Fine-tuning of Language Models with Zero-init Attention. In *arXiv:2303.16199*, 2023b.

- Richard Zhang, Phillip Isola, Alexei A. Efros, Eli Shechtman, and Oliver Wang. The Unreasonable Effectiveness of Deep Features as a Perceptual Metric. In *Conference on Computer Vision and Pattern Recognition (CVPR)*, 2018.
- Shu Zhang, Xinyi Yang, Yihao Feng, Can Qin, Chia-Chih Chen, Ning Yu, Zeyuan Chen, Huan Wang, Silvio Savarese, Stefano Ermon, Caiming Xiong, and Ran Xu. HIVE: Harnessing Human Feedback for Instructional Visual Editing. In *arXiv:2303.09618*, 2023c.
- Susan Zhang, Stephen Roller, Naman Goyal, Mikel Artetxe, Moya Chen, Shuohui Chen, Christopher Dewan, Mona Diab, Xian Li, Xi Victoria Lin, Todor Mihaylov, Myle Ott, Sam Shleifer, Kurt Shuster, Daniel Simig, Punit Singh Koura, Anjali Sridhar, Tianlu Wang, and Luke Zettlemoyer. OPT: Open Pre-trained Transformer Language Models. In *arXiv:2205.01068*, 2022.
- Zhuosheng Zhang, Aston Zhang, Mu Li, Hai Zhao, George Karypis, and Alex Smola. Multimodal Chain-of-Thought Reasoning in Language Models. In *arXiv:2302.00923*, 2023d.
- Deyao Zhu, Jun Chen, Xiaoqian Shen, Xiang Li, and Mohamed Elhoseiny. MiniGPT-4: Enhancing Vision-Language Understanding with Advanced Large Language Models. In *arXiv:2304.10592*, 2023.
